# Supplementary material for: GP4ESP: a hybrid genetic algorithm and particle swarm optimization algorithm for edge server placement
Source: PeerJ Comput Sci. 2024 Oct 25;10:e2439. doi: 10.7717/peerj-cs.2439 (PMC11623000; doi:10.7717/peerj-cs.2439)
Supplement: Supplemental Information 1 — The data of fixed case and the data in the cases of varied ES number, load, and scale (BS). [file peerj-cs-10-2439-s001.xlsx]

## Sheet: Fixed Case
delay (ms)		1	2	3	4	5	6	7	8	9	10	11
	RAND	33.2201	34.4507	33.6855	33.7029	33.2765	33.9634	33.9265	33.583	32.9165	33.8281	33.7157
	GA	32.5254	33.4522	33.0984	32.885	32.6401	33.1733	33.0231	33.1492	32.1711	33.3567	33.1208
	DE	33.3333	34.4828	34.4828	33.3333	33.3333	33.3333	33.3333	33.3333	32.2581	33.3333	33.3333
	SA	32.7228	33.2016	32.9156	33.047	32.5094	32.7006	32.9006	32.4813	31.8246	33.0001	32.6936
	PSO	32.9645	33.4844	33.0516	33.1005	32.6191	33.2817	33.2798	33.1734	32.2283	33.4068	33.1919
	ABC	33.1379	33.1202	33.2871	33.0035	32.5533	32.967	32.9072	33.2415	32.1819	33.443	32.8478
	WOA	33.3598	33.4273	33.9679	33.4006	32.6521	32.9574	32.6801	33.4213	31.5299	33.2639	32.6611
	HHO	34.87	34.0019	34.7625	33.9018	33.4834	34.193	33.5409	34.9977	33.3157	34.0712	33.5286
	GWO	36.6651	37.3748	38.0939	37.3406	37.3341	37.1956	37.9961	37.8711	36.9759	37.0096	37.5994
	PSOM	32.9852	33.438	33.3842	33.3213	32.8497	33.2016	33.189	33.2786	32.0381	33.3174	33.0946
	PSOSA	33.0223	33.3927	33.2086	33.2433	32.525	33.1222	33.2572	33.2449	32.1673	33.4335	33.2393
	nPSO	32.7246	33.6181	33.3609	33.2168	32.7532	33.1109	33.2401	33.1076	32.1466	33.5412	32.5413
	GP4ESP	26.7028	27.9302	27.9195	26.4208	26.1958	26.667	27.1346	26.9488	25.7791	27.5009	27.0816
Time (min)
	RAND	0.00260351	0.00260371	0.00260229	0.0023432	0.0028639	0.00259752	0.00234395	0.0025975	0.00234327	0.00260295	0.00259811
	GA	0.443983	0.444235	0.444501	0.435919	0.459406	0.433279	0.436665	0.437976	0.437764	0.438768	0.435894
	DE	0.258831	0.261967	0.45466	0.250269	0.263263	0.260673	0.260664	0.258572	0.256741	0.259095	0.256497
	SA	2.36601	2.36675	2.34953	2.32775	2.85747	2.32318	2.34046	2.33622	2.33345	2.36127	2.33238
	PSO	0.259356	0.257786	0.28805	0.246083	0.255786	0.254407	0.25727	0.254915	0.251274	0.256743	0.254147
	ABC	0.515311	0.525183	0.534156	0.492925	0.510927	0.51064	0.513236	0.512192	0.512185	0.516362	0.514039
	WOA	0.258309	0.253622	0.265872	0.243879	0.250241	0.250223	0.252068	0.251539	0.257801	0.252069	0.251013
	HHO	0.431482	0.43463	0.425533	0.412011	0.429194	0.429922	0.433852	0.42443	0.429141	0.431203	0.435909
	GWO	0.259343	0.258825	0.255031	0.247904	0.253086	0.254136	0.257544	0.257539	0.25729	0.275533	0.255981
	PSOM	0.284627	0.284625	0.308546	0.270806	0.276807	0.277051	0.283578	0.282531	0.282261	0.278869	0.278084
	PSOSA	0.260129	0.25857	0.264494	0.246332	0.25337	0.252579	0.253628	0.256766	0.256237	0.258063	0.253609
	nPSO	0.418701	0.413787	0.427636	0.397752	0.414565	0.408033	0.411945	0.410895	0.412971	0.414562	0.407516
	GP4ESP	1.2653	1.26863	1.2676	1.3077	1.40584	1.24914	1.27416	1.26188	1.25719	1.2515	1.25041

## Sheet: Varied Cases
Delay (ms)													Time (min)
BS	100	200	300	400	500	600	700	800	900	1000			BS	100	200	300	400	500	600	700	800	900	1000
GA	28.252	30.3489	31.4746	31.7727	32.0594	32.49	32.3561	32.8354	32.8763	32.9632			GA	0.0518222	0.0915446	0.131902	0.172074	0.21909	0.28072	0.315853	0.359319	0.393296	0.440763
DE	28.1747	30.7496	31.9954	32.4658	33.0536	33.2423	33.2423	33.8558	33.836	33.4446			DE	0.0286896	0.0529342	0.0765567	0.100342	0.127083	0.158912	0.184863	0.211746	0.231881	0.276476
SA	33.8051	30.577	31.5142	31.7393	32.188	32.3986	32.3078	32.7557	32.7702	32.727			SA	0.265801	0.480786	0.698706	0.916156	1.15706	1.44915	1.67968	1.91075	2.10074	2.39041
PSO	28.8651	30.6231	31.7628	32.0021	32.328	32.7758	32.4462	33.1289	32.9807	33.0711			PSO	0.0248801	0.0488394	0.0724589	0.0972418	0.125267	0.155621	0.182357	0.207063	0.229447	0.257802
ABC	28.8309	30.692	31.7068	31.9215	32.3555	32.6783	32.4145	33.0577	33.0617	32.9718			ABC	0.0581857	0.105177	0.152878	0.202243	0.253855	0.316198	0.367538	0.426544	0.458554	0.514287
WOA	28.0547	30.3679	31.2156	32.0064	32.098	32.843	32.9112	33.2794	33.4611	33.0292			WOA	0.0259686	0.0492873	0.0736194	0.0970314	0.123268	0.155505	0.1797	0.209551	0.2249	0.25333
HHO	27.8913	30.8451	31.996	32.9507	32.9147	33.3339	33.2586	33.598	33.3292	34.0606			HHO	0.0448119	0.0856475	0.126003	0.165512	0.210895	0.263379	0.307505	0.359509	0.388326	0.428846
GWO	36.9733	35.4298	36.5218	36.25	36.2007	37.0391	36.8495	37.1992	37.2193	37.4051			GWO	0.0295189	0.0523668	0.0763511	0.100092	0.126435	0.158741	0.183528	0.214338	0.229161	0.257474
PSOM	28.4597	30.7118	31.6783	32.1063	32.4624	32.7119	32.5779	33.082	33.0699	33.0998			PSOM	0.0283373	0.0543761	0.0808182	0.109058	0.137802	0.172123	0.200796	0.229458	0.252075	0.282526
PSOSA	28.5047	30.6998	31.6126	32.0577	32.4016	32.75	32.5305	33.0715	32.9756	33.0779			PSOSA	0.0256626	0.0495209	0.0740697	0.0990497	0.1266	0.155981	0.182756	0.208336	0.230701	0.255798
nPSO	28.8947	30.662	31.8448	32.0932	32.4207	32.8382	32.6778	33.1066	33.0134	33.0328			nPSO	0.161968	0.186272	0.23838	0.237695	0.268494	0.306999	0.3343	0.375669	0.385163	0.412578
GP4ESP	20.4348	22.7053	23.8145	24.5794	25.3812	26.1059	26.0296	26.7529	27.0402	26.9346			GP4ESP	0.136925	0.254172	0.370635	0.488347	0.618777	0.775132	0.899172	1.02324	1.12307	1.27812
	2	3	4	5	6	7	8	9	10	11				2	3	4	5	6	7	8	9	10	11
ES	100	200	300	400	500	600	700	800	900				ES	100	200	300	400	500	600	700	800	900
GA	46.2981	43.1177	40.2708	37.7955	35.4383	32.9632	30.6938	28.7336	26.9282				GA	0.318032	0.350236	0.368385	0.393951	0.416059	0.440763	0.46581	0.507172	0.492473
DE	46.7385	43.6255	41.0233	38.5972	36.3593	33.4446	31.4388	29.6548	27.5087				DE	0.185541	0.202309	0.215699	0.245527	0.245725	0.276476	0.276186	0.354657	0.291256
SA	46.308	43.1548	40.2288	37.7287	35.3382	32.727	30.6048	28.653	26.8569				SA	1.69088	1.86808	1.96197	1.98875	2.21544	2.39041	2.4997	2.77234	2.62805
PSO	46.3894	43.2771	40.4644	37.8195	35.6154	33.0711	30.9357	29.0214	27.028				PSO	0.181694	0.200055	0.212224	0.240754	0.24065	0.257802	0.273959	0.318103	0.30115
ABC	46.3677	43.2363	40.3748	37.8208	35.5533	32.9718	30.8866	28.8915	27.1825				ABC	0.370969	0.403997	0.43003	0.459082	0.486724	0.514287	0.548489	0.615922	0.574493
WOA	46.383	43.3657	40.7252	38.0507	35.6978	33.0292	31.1001	29.6444	27.5855				WOA	0.182872	0.200072	0.212385	0.227089	0.239896	0.25333	0.268947	0.296024	0.282857
HHO	46.3176	43.198	40.6057	38.2102	35.8228	34.0606	31.8095	29.7601	28.2272				HHO	0.312135	0.339	0.361808	0.384862	0.411433	0.428846	0.466674	0.512943	0.481126
GWO	46.7172	43.8235	41.9771	40.2104	38.7703	37.4051	36.3007	35.367	34.832				GWO	0.18606	0.202196	0.215915	0.229807	0.242784	0.257474	0.27367	0.304806	0.285987
PSOM	46.3917	43.2643	40.4062	37.8492	35.567	33.0998	30.9209	28.9291	27.1039				PSOM	0.20022	0.219135	0.235421	0.252017	0.266028	0.282526	0.30072	0.333417	0.317607
PSOSA	46.402	43.274	40.4626	37.8737	35.5841	33.0779	30.8993	28.9321	27.1797				PSOSA	0.18317	0.20045	0.213455	0.229484	0.243003	0.255798	0.276013	0.313901	0.290197
nPSO	46.3856	43.2449	40.3566	37.8782	35.6149	33.0328	30.911	28.969	27.1124				nPSO	0.328265	0.356141	0.363127	0.37784	0.394927	0.412578	0.448399	0.468454	0.446951
GP4ESP	44.9932	40.5506	36.7351	33.4437	30.3079	26.9346	24.6146	22.087	19.9306				GP4ESP	0.90075	0.985379	1.05068	1.12441	1.18617	1.27812	1.35588	1.43909	1.4109
Load	0.1	0.2	0.3	0.4	0.5	0.6	0.7	0.8	0.9				Load	0.1	0.2	0.3	0.4	0.5	0.6	0.7	0.8	0.9
GA	27.9748	29.1248	30.4549	31.6682	32.9632	34.2783	35.6775	36.9939	38.2026				GA	0.425296	0.4731	0.44881	0.441742	0.440763	0.44097	0.442604	0.442782	0.426596
DE	28.6478	30.0577	31.1579	32.6552	33.4446	35.2791	36.5552	37.9305	38.9601				DE	0.24827	0.268063	0.271915	0.259266	0.276476	0.259973	0.259407	0.261029	0.255132
SA	27.9054	29.0907	30.4059	31.6513	32.727	34.3419	35.5908	36.9094	38.1311				SA	2.25938	2.48576	2.4154	2.36522	2.39041	2.3623	2.14704	2.41585	2.3066
PSO	28.262	29.3575	30.6777	31.8474	33.0711	34.538	35.691	37.1632	38.3567				PSO	0.246233	0.261121	0.260948	0.257004	0.257802	0.256611	0.256915	0.258396	0.24967
ABC	28.1044	29.4043	30.578	31.8732	32.9718	34.5111	35.8254	37.1441	38.2882				ABC	0.493574	0.54314	0.52506	0.51518	0.514287	0.518313	0.516857	0.51385	0.503395
WOA	28.6557	29.9232	30.9427	32.121	33.0292	34.7794	35.7694	37.356	38.5013				WOA	0.242697	0.282831	0.262545	0.253694	0.25333	0.253834	0.254121	0.255604	0.246705
HHO	29.9724	30.7421	31.6751	32.7677	34.0606	35.4871	36.2358	37.2283	38.5616				HHO	0.414493	0.449475	0.450184	0.432901	0.428846	0.435237	0.43287	0.433655	0.419908
GWO	35.3178	35.3458	36.5091	36.9165	37.4051	38.0125	38.6904	39.3461	39.9171				GWO	0.247342	0.265874	0.275661	0.258222	0.257474	0.257437	0.257511	0.26297	0.252212
PSOM	28.1451	29.3465	30.5792	31.8253	33.0998	34.511	35.7523	37.1099	38.2942				PSOM	0.270685	0.289747	0.291212	0.283191	0.282526	0.284308	0.283709	0.283215	0.276108
PSOSA	28.1568	29.3724	30.6327	31.8461	33.0779	34.5442	35.7572	37.1621	38.3232				PSOSA	0.246776	0.274792	0.265367	0.258266	0.255798	0.258155	0.258911	0.260341	0.251224
nPSO	28.2621	29.4392	30.714	31.8391	33.0328	34.4618	35.7715	37.1065	38.3134				nPSO	0.395953	0.425933	0.427753	0.417538	0.412578	0.415851	0.417402	0.437653	0.4044
GP4ESP	21.7456	22.9603	24.2264	25.9361	26.9346	28.5854	30.485	32.3078	33.7459				GP4ESP	1.20441	1.34854	1.28687	1.26346	1.27812	1.26846	1.26098	1.26248	1.22103
